# Supplementary material for: Ce stabilized Ni–SrO as a catalytic phase transition sorbent for integrated CO2 capture and CH4 reforming
Source: Royal Society of Chemistry journal article supplement (doi:10.1039/d1ta09967a), 2021-12-24
Supplement: d1ta09967a1.pdf [file d1ta09967a1.pdf]

*Electronic Supplementary Information for*

**Ce stabilized Ni-SrO as a catalytic phase transition sorbent for integrated CO<sub>2</sub> capture and CH<sub>4</sub> reforming**

Haiming Gu <sup>a,b</sup>, Yunfei Gao <sup>a,c,\*</sup>, Sherafghan Iftikhar <sup>a</sup>, Fanxing Li <sup>a,\*</sup>

a, Department of Chemical and Biomolecular Engineering, North Carolina State University, Raleigh, NC 27695-7905, United States

b, School of Energy and Power Engineering, Nanjing Institute of Technology, Nanjing 211167, China

c, Key Laboratory of Coal Gasification and Energy Chemical Engineering of Ministry of Education, Shanghai Engineering Research Center of Coal Gasification, East China University of Science and Technology, Shanghai 200237, China

**This Supplementary information contains the following Figures:**

Figure S1: HRTEM images of sorbents: (a) reacted SrCe<sub>0.5</sub>Ni<sub>0.5</sub> and (b) reacted SrNi.

Figure S2: Raman analysis carbon deposition on (a) typical sorbents after 1<sup>st</sup> DRM (b) SrCe<sub>0.5</sub>Ni<sub>0.5</sub> at different reaction stage during isothermal SLDRM process at 875 °C.

Figure S3: SEM images of SrCe<sub>0.5</sub>Ni<sub>0.5</sub> during SLDRM process: (a) after 1<sup>st</sup> carbonation, (b) after 1<sup>st</sup> decarbonation (c) after 30<sup>st</sup> carbonation, (d) after 30<sup>st</sup> decarbonation.

Figure S4: XRD pattern of SrCe<sub>0.5</sub>Ni<sub>0.5</sub> during SLDRM process (a) 1<sup>st</sup> cycle and (b) 30<sup>th</sup> cycles.

---

\* Author to whom correspondence should be addressed

E-mail address: ygao9@ncsu.edu (Y. Gao), fli5@ncsu.edu (F. Li).

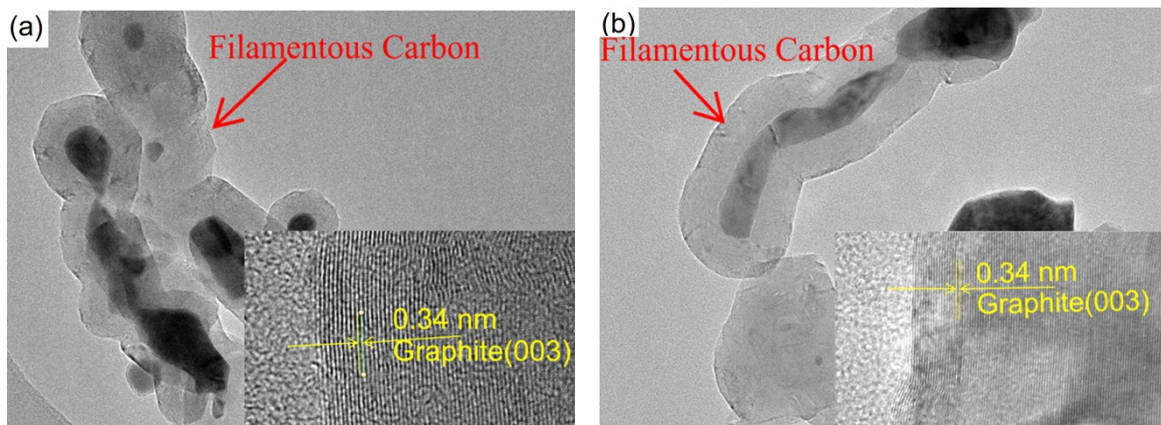

Figure S1: HRTEM images of sorbents: (a) reacted  $\text{SrCe}_{0.5}\text{Ni}_{0.5}$  and (b) reacted  $\text{SrNi}$ .

The reactivity of catalyst is vital to  $\text{CH}_4$  conversion, and the carbon deposition during this SLDRM process would block the catalyst active site causing reactivity deterioration. The carbon deposition could be mainly classified into amorphous and nanotube carbon with different property. Figure S1 shows the HRTEM analysis for  $\text{SrCe}_{0.5}\text{Ni}_{0.5}$  and  $\text{SrNi}$  to evaluate type of carbon deposition. The HRTEM images (Figures S1(a) and S1(b)) indicate that filamentous carbon formed on both materials, and the lattice space corresponded to graphite.

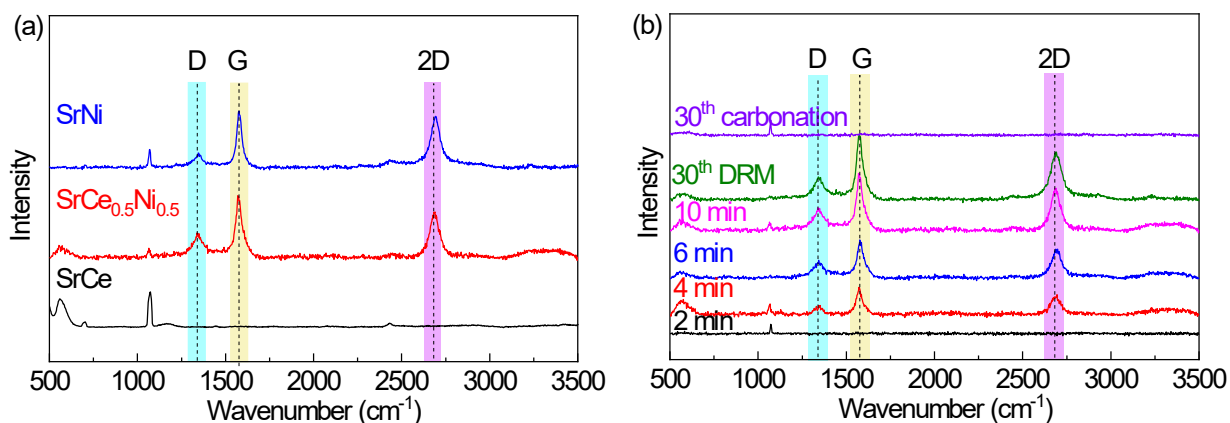

Figure S2: Raman analysis carbon deposition on (a) typical sorbents after 1<sup>st</sup> DRM (b) SrCe<sub>0.5</sub>Ni<sub>0.5</sub> at different reaction stage during isothermal SLDRM process at 875 °C

Figure S2 shows the Raman analysis for SrCe<sub>0.5</sub>Ni<sub>0.5</sub> and SrNi to evaluate type of carbon deposition. The Raman spectrum patterns in Figure S2(a) indicate only D (~1340 cm<sup>-1</sup>), G (~1575 cm<sup>-1</sup>) and 2D (~2682 cm<sup>-1</sup>) band carbon was observed on SrCe<sub>0.5</sub>Ni<sub>0.5</sub> and SrNi, confirming carbon deposition of graphite. As expected, the used SrCe did not contain carbon peak, indicating no carbon deposition. Figure S2(b) compares the carbon spectrum on SrCe<sub>0.5</sub>Ni<sub>0.5</sub> at different reaction time. No detectible carbon deposition was formed in the first 2 min during the 1<sup>st</sup> DRM. It indicates that carbonates were enough for CH<sub>4</sub> conversion. Then, D, G and 2D band carbon were formed regardless of reaction time or cycle. Fortunately, this carbon deposition could be completely removed after carbonation and no carbon peak was observed after 30<sup>th</sup> carbonation, indicating that. It is favorable for the reactivity stability of Ni catalyst.

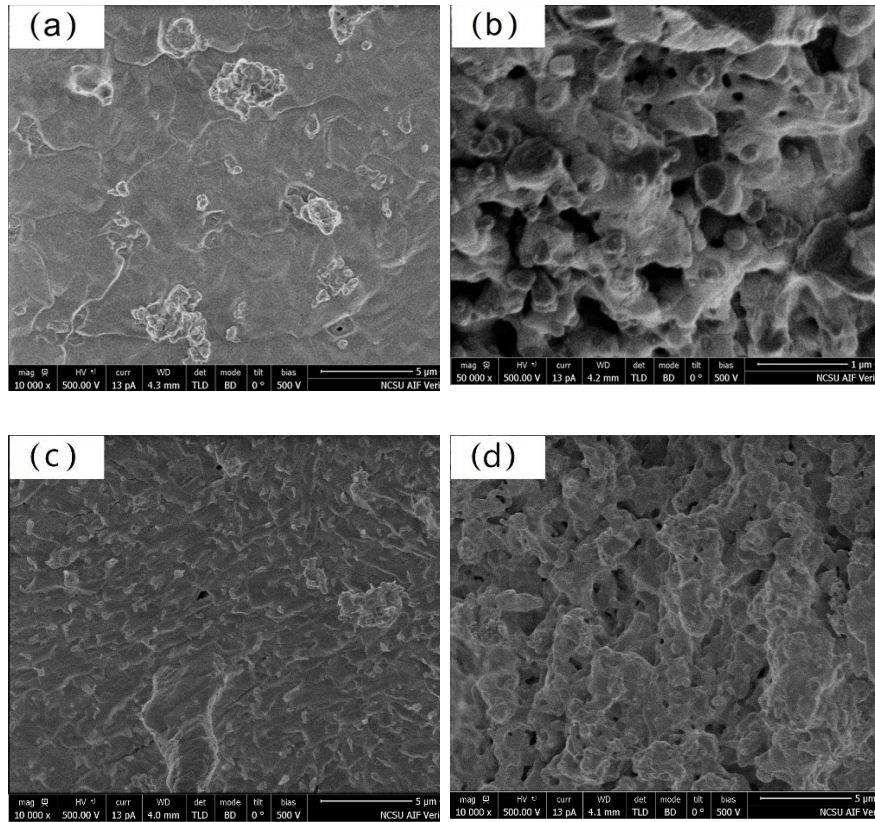

Figure S3: SEM images of SrCe<sub>0.5</sub>Ni<sub>0.5</sub> during SLDRM process: (a) 1<sup>st</sup> carbonation, (b) 1<sup>st</sup> decarbonation (c) SEM at 30<sup>th</sup> carbonation, (d) SEM at 30<sup>th</sup> decarbonation

The microstructure is a key factor affecting the cycle performance of the selection of material. Figure S3 shows the SEM images of SrCe<sub>0.5</sub>Ni<sub>0.5</sub> during 1<sup>st</sup> and 30<sup>th</sup> SLDRM cycle. The SEM images indicate that the smooth surface of carbonated material turned into a rough surface after decarbonation during 1<sup>st</sup> and 30<sup>th</sup> cycles. In spite of some grain agglomeration, irreversible sintering was never observed during multiple carbonation/decarbonation cycles.

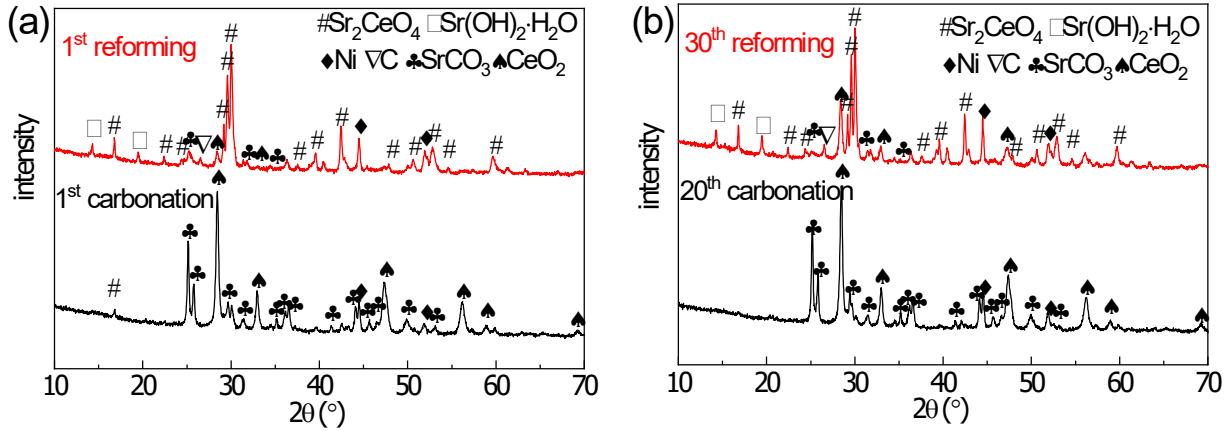

Figure S4: XRD pattern of  $\text{SrCe}_{0.5}\text{Ni}_{0.5}$  during SLDRM (a) 1<sup>st</sup> cycle and (b) 30<sup>th</sup> cycles.

Figure S4 shows the Xrd patterns of  $\text{SrCe}_{0.5}\text{Ni}_{0.5}$  during 1<sup>st</sup> and 30<sup>th</sup> SLDRM cycle. As is shown in Figure S4(a),  $\text{SrCO}_3$  and  $\text{CeO}_2$  are two main phases in the carbonated sorbent. Then they turned into  $\text{Sr}_2\text{CeO}_4$  as the  $\text{CH}_4$  reforming process consuming some  $\text{CO}_2$ . Some  $\text{SrCO}_3$  and  $\text{CeO}_2$  were also observed in the reduced sample due to uncomplete decarbonation during the reforming process. In view of hygroscopic property, some  $\text{Sr}(\text{OH})_2$  instead of  $\text{SrO}$  appears in the material. The highly consistent of XRD patterns of sorbent after 30 cycle operation indicates that the material owns a perfect regeneration capacity.
